# Supplementary material
Source: MDPI journal article supplement (https://www.mdpi.com/2673-7590/1/1/7)
Supplement: s1 [file s1]

Archive with 3 entries (3 files):
- futuretransp-1216546-supplementary/Bicycle Boulevard Map, part 1.pdf
- futuretransp-1216546-supplementary/Bicycle Boulevard Map, part 2.pdf
- futuretransp-1216546-supplementary/Supplementary File 1.pdf
