# Supplementary material
Source: MDPI journal article supplement (https://www.mdpi.com/2673-7590/1/1/7)
Supplement: s1 [file s1 › futuretransp-1216546-supplementary/Supplementary File 1.pdf]

## Supplementary File 1. Transportation questionnaire

**Instructions:** We are interested to learn more about how you travel from place to place, and the things that affect your choice of method of transportation. **Please respond to the following questions for the present and for the same time of the year in 2016.** This will allow us to see how your travel choices have evolved over the last 2 years. There are no good or bad answers.

**The following questions are about how you traveled from place to place, including to places like work, stores, movies, and so on.**

- During the **last 7 days**, on how many days did you travel in a **motor vehicle** like a train, bus, car or tram?  
Last 7 days: \_\_\_\_\_ days per week  
2016: \_\_\_\_\_ days per week  
☐ No travel in a motor vehicle → Go to question 3
- How much time did you usually spend on one of those days traveling in a train, bus, car or tram, or other kind of motor vehicle?  
Last 7 days: \_\_\_\_\_ hours per day  
2016 \_\_\_\_\_ hours per day  
Last 7 days: \_\_\_\_\_ minutes per day  
2016 \_\_\_\_\_ minutes per day
- During the **last 7 days**, on how many days did you **bicycle** for at least 10 minutes at a time to go from place to place?  
Last 7 days: \_\_\_\_\_ days per week  
2016: \_\_\_\_\_ days per week  
☐ No bicycle from place to place → Go to question 5
- How much time did you usually spend on those days to bicycle from place to place?  
Last 7 days: \_\_\_\_\_ hours per day  
2016 \_\_\_\_\_ hours per day  
Last 7 days: \_\_\_\_\_ minutes per day  
2016 \_\_\_\_\_ minutes per day
- During the **last 7 days**, on how many days did you **walk** for at least 10 minutes at a time to go from place to place?  
Last 7 days: \_\_\_\_\_ days per week  
2016: \_\_\_\_\_ days per week  
☐ No walking from place to place → Go to question 7
- How much time did you usually spend on those days to walk from place to place?  
Last 7 days: \_\_\_\_\_ hours per day  
2016 \_\_\_\_\_ hours per day  
Last 7 days: \_\_\_\_\_ minutes per day  
2016 \_\_\_\_\_ minutes per day

7. The following questions are about your **current** attitudes toward cycling, walking and driving. Please indicate your level of agreement with each statement below by drawing an X in the appropriate box:

| Statement                                               | Strongly disagree | Somewhat disagree | Neither agree nor disagree | Somewhat agree | Strongly agree |
|---------------------------------------------------------|-------------------|-------------------|----------------------------|----------------|----------------|
| I like riding a bike                                    |                   |                   |                            |                |                |
| Biking can sometimes be easier for me than driving      |                   |                   |                            |                |                |
| I prefer to bike rather than drive whenever possible    |                   |                   |                            |                |                |
| I like walking                                          |                   |                   |                            |                |                |
| Walking can sometimes be easier for me than driving     |                   |                   |                            |                |                |
| I prefer to walk rather than drive whenever possible    |                   |                   |                            |                |                |
| Traveling by car is safer overall than riding a bicycle |                   |                   |                            |                |                |
| Traveling by car is safer overall than taking transit   |                   |                   |                            |                |                |
| Traveling by car is safer overall than walking          |                   |                   |                            |                |                |

8. The following questions are about your attitudes toward cycling, walking and driving **at the same time of the year in 2016**. Please indicate your level of agreement with each statement below by drawing an X in the appropriate box:

| Statement                                               | Strongly disagree | Somewhat disagree | Neither agree nor disagree | Somewhat agree | Strongly agree |
|---------------------------------------------------------|-------------------|-------------------|----------------------------|----------------|----------------|
| I like riding a bike                                    |                   |                   |                            |                |                |
| Biking can sometimes be easier for me than driving      |                   |                   |                            |                |                |
| I prefer to bike rather than drive whenever possible    |                   |                   |                            |                |                |
| I like walking                                          |                   |                   |                            |                |                |
| Walking can sometimes be easier for me than driving     |                   |                   |                            |                |                |
| I prefer to walk rather than drive whenever possible    |                   |                   |                            |                |                |
| Traveling by car is safer overall than riding a bicycle |                   |                   |                            |                |                |
| Traveling by car is safer overall than taking transit   |                   |                   |                            |                |                |
| Traveling by car is safer overall than walking          |                   |                   |                            |                |                |

9. The following questions are about your **current** cycling habits. Please answer on a scale of 1 to 7 for each statement that start with “*cycling for transportation is something...*” by drawing an X in the appropriate box (**1 = strongly disagree; 7 = strongly agree**)

| Cycling for transportation is something...  | 1 | 2 | 3 | 4 | 5 | 6 | 7 |
|---------------------------------------------|---|---|---|---|---|---|---|
| I do automatically                          |   |   |   |   |   |   |   |
| I do without having to consciously remember |   |   |   |   |   |   |   |
| I do without thinking                       |   |   |   |   |   |   |   |
| I start doing before I realize I’m doing it |   |   |   |   |   |   |   |

10. The following questions are about your cycling habits **at the same time of the year in 2016**. Please answer on a scale of 1 to 7 for each statement that start with “*cycling for transportation is something...*” by drawing an X in the appropriate box (**1 = strongly disagree; 7 = strongly agree**)

| Cycling for transportation is something...  | 1 | 2 | 3 | 4 | 5 | 6 | 7 |
|---------------------------------------------|---|---|---|---|---|---|---|
| I do automatically                          |   |   |   |   |   |   |   |
| I do without having to consciously remember |   |   |   |   |   |   |   |
| I do without thinking                       |   |   |   |   |   |   |   |
| I start doing before I realize I’m doing it |   |   |   |   |   |   |   |

11. The following questions are about how significant others **currently** view cycling in your opinion. Please indicate your level of agreement with each statement below by drawing an X in the appropriate box:

| Statements                                                                                                                                   | 1 | 2 | 3 | 4 | 5 |
|----------------------------------------------------------------------------------------------------------------------------------------------|---|---|---|---|---|
| If I was to use cycling regularly, most of the people who are important to me would (strongly disapprove = 1; strongly approve = 5)          |   |   |   |   |   |
| Most of the people who are important to me would recommend that I use cycling on a regular basis (strongly disagree = 1; strongly agree = 5) |   |   |   |   |   |
| The people who are most important to me think I should use cycling on a regular basis (strongly disagree= 1; strongly agree = 5)             |   |   |   |   |   |

12. The following questions are about how significant others viewed cycling **at the same time of the year in 2016** in your opinion. Please indicate your level of agreement with each statement below by drawing an X in the appropriate box:

| Statements                                                                                                                                   | 1 | 2 | 3 | 4 | 5 |
|----------------------------------------------------------------------------------------------------------------------------------------------|---|---|---|---|---|
| If I was to use cycling regularly, most of the people who are important to me would (strongly disapprove = 1; strongly approve = 5)          |   |   |   |   |   |
| Most of the people who are important to me would recommend that I use cycling on a regular basis (strongly disagree = 1; strongly agree = 5) |   |   |   |   |   |
| The people who are most important to me think I should use cycling on a regular basis (strongly disagree= 1; strongly agree = 5)             |   |   |   |   |   |

13. The following questions are about how you **currently** perceive traffic in your neighborhood. Please indicate your level of agreement with each statement below by drawing an X in the appropriate box:

|                                                                                                                    | Strongly disagree | Somewhat disagree | Somewhat agree | Strongly agree |
|--------------------------------------------------------------------------------------------------------------------|-------------------|-------------------|----------------|----------------|
| There is so much traffic along nearby streets that it makes it difficult or unpleasant to cycle in my neighborhood |                   |                   |                |                |
| The speed of traffic in most nearby streets is usually slow (50 km/h or less)                                      |                   |                   |                |                |
| Most drivers exceed the posted speed limits while driving in my neighborhood                                       |                   |                   |                |                |

14. The following questions are about how you perceived traffic in your neighborhood **at the same time of the year in 2016**. Please indicate your level of agreement with each statement below by drawing an X in the appropriate box:

|                                                                                                                    | Strongly disagree | Somewhat disagree | Somewhat agree | Strongly agree |
|--------------------------------------------------------------------------------------------------------------------|-------------------|-------------------|----------------|----------------|
| There is so much traffic along nearby streets that it makes it difficult or unpleasant to cycle in my neighborhood |                   |                   |                |                |
| The speed of traffic in most nearby streets is usually slow (50 km/h or less)                                      |                   |                   |                |                |
| Most drivers exceed the posted speed limits while driving in my neighborhood                                       |                   |                   |                |                |

### **Socio-demographic questions**

15. I am a:      ☐ female      ☐ male      ☐ other (e.g., transgender)      ☐ prefer not to answer

16. I am: \_\_\_\_\_ years old

17. My highest level of education is:

- a. Less than high school
- b. High School
- c. Some college
- d. Undergraduate degree
- e. Graduate degree

18. I own a bicycle:

- a. Yes
- b. No

19. I own or rent a motor vehicle:

- a. Yes
- b. No

20. What else do you think might be needed to make cycling safer and more attractive in the City of Lethbridge?

---

---

---

---

21. If you wish to enter the draw to win a \$100 gift certificate at a local bicycle shop, please provide us with your name and either an email address or phone number where we could reach you.

---

**Thank you so much for taking the time to respond to the survey! 😊**
