# Supplementary material
Source: MDPI journal article supplement (https://www.mdpi.com/2673-7590/1/1/7)

# 7th Avenue South Bike Boulevard - 13th Street to Mayor Magrath Drive South

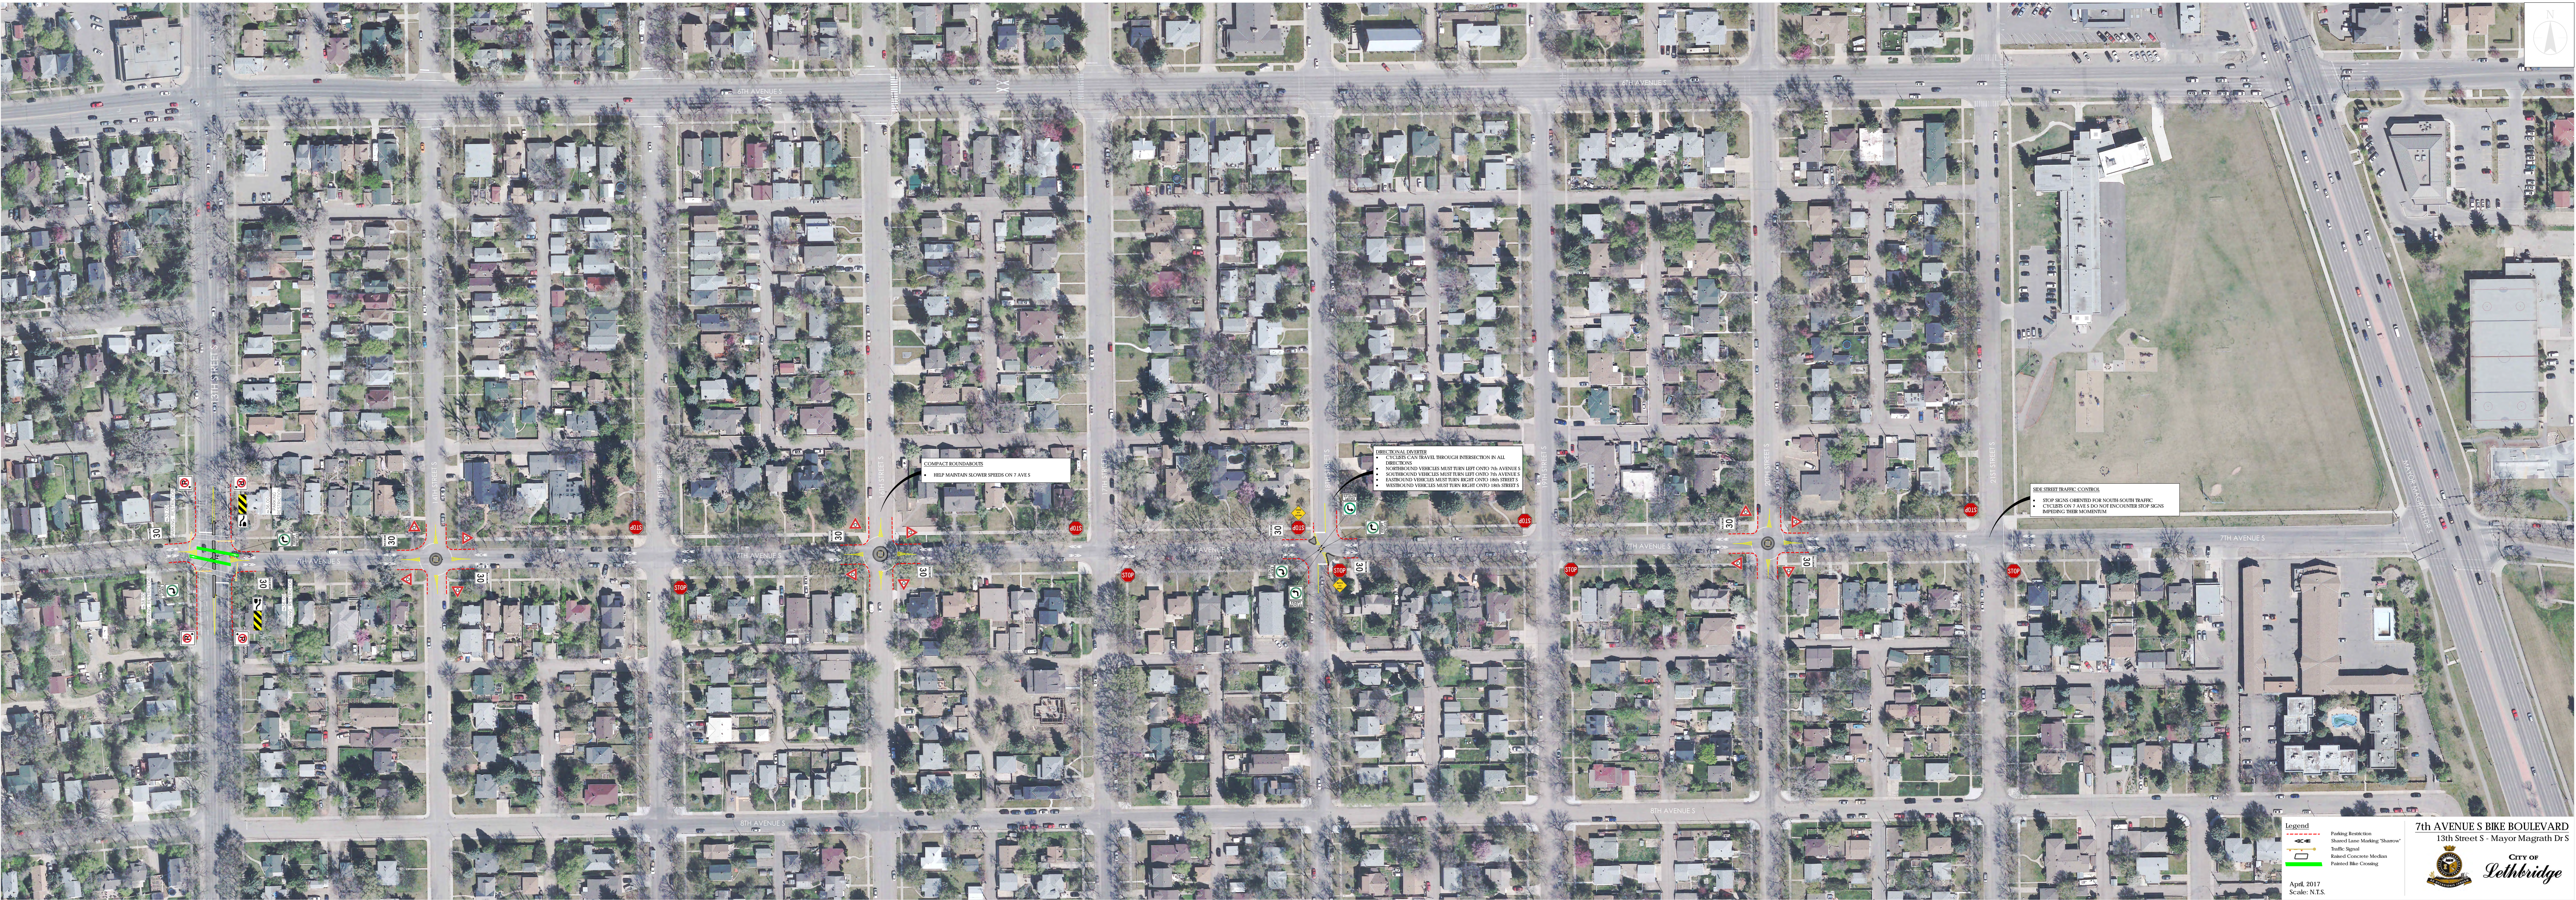

Supplement: s1 [file s1]
